# Supplementary material for: Viral AlkB proteins repair RNA damage by oxidative demethylation
Source: PubMed Central journal article supplement — Nucleic Acids Res. 2008 Aug 21;36(17):5451–61. doi: 10.1093/nar/gkn519 (PMC2553587; doi:10.1093/nar/gkn519), 2008-08-21
Supplement: gkn519_1.pdf [file gkn519_1.pdf]

# Supplementary Information

for

## **Viral AlkB proteins repair RNA damage by oxidative demethylation**

Erwin van den Born<sup>1</sup>, Marina V. Omelchenko<sup>2</sup>, Anders Bekkelund<sup>1</sup>, Vibeke Leihne<sup>1</sup>,  
Eugene V. Koonin<sup>2</sup>, Valerian V. Dolja<sup>3</sup>, and Pål Ø. Falnes<sup>1,4\*</sup>

<sup>1</sup>Department of Molecular Biosciences, University of Oslo, P.O. Box 1041 Blindern, N-0316 Oslo, Norway

<sup>2</sup>National Center for Biotechnology Information, National Institutes of Health, Bethesda, Maryland 20894, USA

<sup>3</sup>Department of Botany and Plant Pathology and Center for Genome Research and Biocomputing, Oregon State University, Corvallis, OR 97331, USA

<sup>4</sup>Centre for Molecular Biology and Neuroscience, Rikshospitalet-Radiumhospitalet HF, University of Oslo, Oslo, Norway

\*Corresponding author. Tel: +47–22854840; fax: +47–22854443. E-mail:

[pal.falnes@imbv.uio.no](mailto:pal.falnes@imbv.uio.no)

Figure S1

```
168038958 | Strep | Phypa : DDQVEIVRECESTLGRGYMCLGKHKHDTATTN-SVTPVRRQNTPEKFSDFVVKRSLQMDPTVGVNFFVEQTAGLGMFQKDEASARGSPVWFSFVGDGSIHAYSLESQVLLIFGGGPRSMIFHVESIQGRDNLITFR
115456185 | Strep | Orysa : DDQVDIIRRCQKLGIGSMMLGKGNDDPNRSRGGTRPFDFGP-PPEWFKVVDKAIQLSPDICTVNFVTSSSGKGLGFKQKDKTKKGLPVVFSLSGDTAEFLYDLESQVLLIFGGGSRLLIFHGVSRIKPGRNLTFRQ
157339904 | Strep | Vitvi : SDQVKIVKCKQELGLGSMMLGKGNDDPETGDEDERPVDNP-PDEFHFKVKEAIQMIPTDICTVNFVTSSTGRGLGFKQKDEDEKGLPVVFSIGDSAKELYLLESQVLLIFGGGSRRIIFHGVASILPGRNLTFRQ
30683015 | Strep | Arath : NDQVMVINKRRRLGLGEMMLGKGNDDPETSGETRPFDFGA-PAEFNQVEKAVKMLFDICTVNFVTSSTGRGLGFKQKDEDEKGLPVVFSIGDSAEFLYTLLESQVLLIFGGGSRKRVFHCVSRIRPGRNLTFRQ
72161831 | Actin | Thefu : EQQRALVDLCREWMRGPMTSLGWYRNP---RRSATLPPDPVPPVSTALRGLAPAYDVALVNFVMAATATVGMFRCTDER-TDAPVWVSVSLGDTCVRFERLRSQDLVFGGSPSRWAYHGVPRVFSGRNLTFR
134099909 | Actin | Sacer : GQQRMLVVRACREWATGPTVCLGWHYYP---YRSRTLDDPVPVSGDGRRAVAYRFDVALVNFVDDSDARVGMFRKDERAD--PVVSVSLGDTGMFRLELCSQDLVFGGSPSRMAYHGVLRILRGRNLTFR
21219556 | Actin | Strco : GQQRRELLDACREWARPPQVCLGRHMYYP---YGAATAVDPVPARLDGARRAVTAPYDIALVNFVDADARVGMFRADDER-TDAPVWVSVSLGDTCVRFERLRSQDLVFGGSPSRLAYHGVPRVHRGRNLTFR
19551394 | Actin | Corgl : AEQKALVAQARDLAREVLHLGKY--KASNP-NRVVVDVVDGLPDSFVDLAHRALLYRAEAAVNFVSPDASVGMFRANEEESA--PWVSVSISGDTGIRLPLMSQDLVIFVGGANRQAFHGVPSIEEGRNLTFR
38232967 | Actin | Cordi : DKQAEVLREIREIARTYLHLGKY--HYPS-NRIDKIAGV-PDSFAAPEALRFVPEMVLVNFVPPGSRVGMFRVEFEE-SRAPVWVSVSIGDEALRMTLCSQDLVFGGPKRFAYHGVVRVWQGRNLTFR
13474252 | Alpha | Meslo : AIQDALVEDVRSIVQATNCGPLGVTDKENRY-QPTHPPPESELDRWRQVSGNPPEACINNFVTDADAKVGLGQRDEADFSAPVWVSVSLGDDCLERVRKSDVWVVGEGRLAFHGVDRVIYGRNLTFR
51660357 | Gamma | Idilo : ADDEALLNDIRGLVKQSSSCGSGYGLSDK-NRY-QNIDPPVQPSLKVATQVSRFQPSDCLVNFVTPGAKVGLGQKNEADFSKPVVSVSFGFLPITEMWSLQADALVWGGKDRRLRYHGVQQLKRCRNLITFR
1163638 | Gamma | Escco : FNAAEQRLIRDINDVASQTNCGHLGVTTHROQLSPIDPQKQPSFHNHCQRAATFQPDACLINRVAPGAKVSLGQKDEPDLRAPVWVSVLGLPAIQFLLEHGDVWVWGGESRLFYHGVQPLKDCRYNLTFR
16130149 | alkB : FNAAEQRLIRDINDVASQTNCGHLGVTTHROQLSPIDPQKQPSFHNHCQRAATFQPDACLINRVAPGAKVSLGQKDEPDLRAPVWVSVLGLPAIQFLLEHGDVWVWGGESRLFYHGVQPLKDCRYNLTFR
91775654 | Betap | Metfl : SEQQDQLLHDLQTVLAQCNCGRGLGVDRAVRQTHDPLKPPSFAAAQASAAAFVPDACLINRVQTAGKLSLQKDEQDFSQPVVSVSLGLAATLFLFNHGDVWVWGGQARLRHGVGLPLKDVIRNLTFR
39934792 | Alpha | Rhopa : RANERELLAAIDAVVARTSCGSGVGVTDTRRNRSPNDPDPVAVTRDLAQRAAAFPDACLINRVVPGAKVSLGQKDEADFSAPVWVSVLGLPAIQFLLEHGDVWVWGGSPRLVYHGVPLTKRQRNLTFR
108763595 | delta | Myxxa : LSHDAELLSAVQDVALATS CGSWGVTDRTRRRAADVPPVPAIFLRPAQAAAFVPDACLINRVVPGAKVSLGQKDEADFSAPVWVSVLGLPAIQFLLEHGDVWVWGGPARLRVYHGVTPLEGRNLTFR
148254384 | Alpha | Brasp : RSQAEALVAVIEAIAAQTSCGSCGCVTDRTNRDAVDLPPVPLFRFDLAEQAASFPDACLINRVVPGAKVSLGQKDEADFSAPVWVSVLGLPAIQFLLEHGDVWVWGGPARLAFHGVAPLAQRNLTFR
73538928 | Betap | Raleu : RTQAPQLLDEIGDIAAKTNCGQAGVSDRTNRDPCDPLPAAFLDRAAAAFAFPDACLINRVVPGAKVSLGQKDEADFSAPVWVSVLGLPAIQFLLEHGDVWVWGGPARLAFHGVAPLAQRNLTFR
118346635 | Cilio | Tetth : RQQLLEVVIQCMNTYVKRHFNRKIRNSVNGADDNRLYPPMPDITNEAEFAFNKYPEAVVNFVMDKKNYSGLDGDKDQKSPHFSFTFGCCSILMRDACLMLVSGYSRNCYHGVPRIFDSRNLNFRQ
145491776 | Cilio | Parte : DDQIRISKLCMNEYINQHFNNKIRANVGYDDNNRQYPK-PDPQESQSRANNYQSESVINNFVQSHDNYTGLDDELDDQDPSVSVSFGFLSSVVEVGLKSDCLDLVWGGHARKYHGVPRVLEHRNLTFR
157770664 | Metaz | Caerb : QNSGMWLRKRAFSAKPLLTALRNTLLGVNDNTKKYPPVDEDFQGNLINSMRFDATLNVYPPKSAHSPHVKSER-SNAPVSVSISLGTAVVLSWVSNQDFLIMHGQRLVYHGVPCIGCSRNLNFRQ
164650570 | Fungi | Lacbi : EKQRQLAKWSLKHARHSLLYKLRANIGWVHGKTKQYDKGDEERDNCNSAVAYEPDAGVNFVQTKDTEMAHVRSEVCAVSPVSVSLGNAAIQLVLRSDVVIIMSGTCRRAYHGVPRILTRVNLNFRQ
58262090 | Fungi | Cryne : EQQLSFLHDSLARYTLPKWLKEIRMANLGNWQSTKSYDTPAPADHDCSEAVAYKPTGTGVNFVQMLNDTMAHVRSELDPARPVVSVSLGHAAILLITRSDMLIMSGGKGRQSYHGVPRILTRVNLNFRQ
19113345 | Fungi | Schpo : ELQMQLKSIMFTIQIDLVHKKLRVNTLGGDDTKEEYPPPKDGFVEKVVKSKAEAAVNFVSPGDTTSAIESEEDLTLPLISLMSGLDCTVLRHSCQVVIIMTGTSRKAFHGVKHKCSF---KYLITYSQ
50555041 | Fungi | Yarli : AVQSRLVNTEIQYLPPIKKNQLRNLVTLLGGNNHTKAYAPPKNNIYELLSRPLFINPEAAVNFVSPGDTTSPHQQVAEL-SQDDVSVSISGLDAIYVYMLRSDVVIIMWGGKSRHAYHGVKGVFTKRVNLNFRQ
145243552 | Fungi | Aspni : AVQVELLSRFLHRDLSNINLRKLRVNTLGGDDTAKVYPPPRDIAKLLHAMFPTEAQAALNVVNSAGDHSPPRQVSED-CDVGLISVSGCDGLLIRLRSQDAVIYDGSRFW-HAVPKIVGKRVNLNFRQ
70527001 | Fungi | Aspni : TVQMEILLNRLFHRDLSNVLTKKLRVNTLGGDDTAKEYYPPPEDEAEELRAAFTEPEAAVNLVSPGNTTSPRRVSEECDA-GHISVSGCDGLLIRLRSQDAVIYDGSRFW-HAVPKIVGKRVNLNFRQ
67991683 | Fungi | Aspfi : AVQIELLSRFLHRDLSNMLTKKLRVNTLGGDDTAKEYYPPPADIAKLLRTAFTPKAEAAVNLVSPGDTTSPRRVSEEC--GHISVSGCDGLLIRLRSQDAVIYDGSRFW-HAVPKIVGKRVNLNFRQ
164422709 | Fungi | Neucr : FVQKTLRLNIHHRDLNQVFNKRLHNVTLGGDDTNRVYPPPKDLAGLETLFPFQAQAALVNFVTPGDTTMMRVRVEE-TDKGVSVSISGCDLSEMLRRSQDIYVYKSRFAW-HGVPKIFNKRNLNFRQ
516392041 | Fungi | Maggr : EVQKTLLSKLIHRDLNVMDRRLHNVTLGGDDTNRVYPPPKDLAGLETLFPFQAQAALVNFVTPGDTTMMRVRVEE-TDKGVSVSISGCDLSEMLRRSQDIYVYKSRFAW-HGVPKIVNKRNLNFRQ
72387544 | Kinet | Trybr : AEQQEFCRAALLEYSDRSYPPMRATVGFVQSSSKSYCKPRRARKCVERIARYEPQTSVNFVPGAMMAHVRSEEVQLQPLISISLGCSCVFLMWRSDVVIYVSGASRTAYHGVPRIMHLRNLNFRQ
157867117 | Kinet | Leima : AEQQRCREAVLDYADSCYQPPMRATLGYEYQTRKYVCRPSARRCDLVLSYEPQATVNFVPGVSMGCHQDISETLEQPMHSLSGCSATLMLRSDVAVAFVTPGSRSAFYHGVPRILHMRVNLNFRQ
66808825 | Dicot | Diodi : SQQKWKIHALEDYADPQLLDKLAISTLGYEYQTRKYVCRPSARRCDLVLSYEPQATVNFVPGVSMGCHQDISETLEQPMHSLSGCSATLMLRSDVAVAFVTPGSRSAFYHGVPRILHMRVNLNFRQ
119115270 | Metaz | Anoga : EAQRQWMTSLADYPIPKFASLRATLGYEYQTRNKLYDPCCEGAVVRYVATFSPPEAAVNFVPAAGATAGTTHSEDDQATPFSFSGQPAVELLILRSQDIYVYVWGSRLCYHGVPRVCHSRNLNFRQ
66515297 | Metaz | Apime : YGRYWIICKLKEYSKKELISKLRATVGFYHNDTKLYSCKPIESLTSFLAQFKAEAAVNFVPRMNSTAGTTHSELNVEAPLFSISFGQTAIFLIFLRSQDIYVYVWGSRLCYHGVPRILHMRVNLNFRQ
45555401 | Metaz | Drome : RGRYWSARCLRDFPRTRIKSAMRNTTFYGHNDTKIYDMQPEDSSCGLFAQFKPEAAVNFVPRVSTAGTTHSEPNKASPLFSFSGQTAIFLIFLRSQDIYVYVWGSRLCYHGVPRILHMRVNLNFRQ
66472360 | Metaz | Danre : GSQQFWVKQCLKIYPOKTLLEKLRVNTLGYEYQTRNSKTYNHPKESQSHKVAADFQAEAGLNVYRSDSSGIVVESELDHTRPLISYFSGQTAIFLIFLRSQDIYVYVWGSRLCYHGVPRILHMRVNLNFRQ
148223171 | Metaz | Xenla : GWQHRWVRQCLKLYPKSILEKLRVNTLGYEYQTRDKTYNHRPLEAEASRCSAFKPEAGLNVYRHLDSGIVVESELDHQSPILSFSFGQSAIFLIFLRSQDIYVYVWGSRLCYHGVPRILHMRVNLNFRQ
71895969 | Metaz | Galga : GQCRHWVKQCLKYTQKSLEKLRVNTLGYEYQTRDKKYSHPSDAFSEQVAAFQQAAGLNVYRHLDSGIVVESELDHTRPLISYFSGQSAIFLIFLRSQDIYVYVWGSRLCYHGVPRILHMRVNLNFRQ
87298840 | Metaz | Homsa : GYQWHWVKQCLKLYSQKSLEKLRVNTVGYEYQTRNSKKYSHPSDGFSEQVAAFRAEAGLNVYRDLSTGIVVESELDHTRPLISYFSGQSAIFLIFLRSQDIYVYVWGSRLCYHGVPRILHMRVNLNFRQ
156523266 | Metaz | Musmu : GQCRHWVKQCLKLYSQKSLEKLRVNTLGYEYQTRNSKKYSHPSDGFSEQVATFQAEAGLNVYRDLSTGIVVESELDHTRPLISYFSGQSAIFLIFLRSQDIYVYVWGSRLCYHGVPRILHMRVNLNFRQ
115681547 | Metaz | Strpu : GAQRVWVRRLADYPCRLMDQLRNVTLGYEYQTRNNVYVQHPDEDGMSALIAEFQSQAAVNFVHMDDTGGTTHSEFDLTPALISYFSGQSAIFLIFLRSQDIYVYVWGSRLCYHGVPRILHMRVNLNFRQ
156392096 | Metaz | Nemev : GAQHYWARRCLEDFPRKNLIDRLRNVTLGYEYQTRNNVYDYKPKDGGMHHLAEYTFEAGVNFVHLSASGGTTHSELDLWPLISYFSGQSAIFLIFLRSQDIYVYVWGSRLCYHGVPRILHMRVNLNFRQ
168044851 | Strep | Phypa : PMANMLYKHLHLPWYNTPRYTVFVIDEAPSSKQPVYPRCQEKRCVQEYVNFVNFVADGTSVSPSDESEFLNTPCIASLSLGGTRDVMALRSQDMVWVWGTQANWFHSPKRTAPRNLNFRQ
67901590 | Fungi | Aspni : PTARDLFLQRLRELPFYNTPRFTTVFGIDAVPASTRR--IPKCDQQRQAVEASSYVNFVNFVADGTSVSPSDESEFLNTPCIASLSLGGTRDVMALRSQDMVWVWGTQANWFHSPKRTAPRNLNFRQ
46108746 | Fungi | Gibze : NVANLFFFLRAELPFYRTPRWTVFGLDDEDKGGSRAVPCKDEARRRTELCYVNFVNFVADGTSVSPSDESEFLNTPCIASLSLGGTRDVMALRSQDMVWVWGTQANWFHSPKRTAPRNLNFRQ
39945158 | Fungi | Maggr : YVAKDWDFLRSLLPFY-RVEYTVFGLDDEDEAGSKPVYPCADHARRSTEACVNFVNFVADGTSVSPSDESEFLNTPCIASLSLGGTRDVMALRSQDMVWVWGTQANWFHSPKRTAPRNLNFRQ
114046475 | Gamma | Shesp : AQQHALLKEAESYPLRSRIPRQVYFGDGLVSLGIRFVPKYQKRDKLRQLSGNVVNRVADGQCCVAVSDEPEISGDSHASTSLGASRDVISHSGLLIMHWMQNDLHSPKRTAPRNLNFRQ
167521521 | Choan | Monbr : ---RRIAAGDAGTTPSHKTMLETPOQRQKHEVVEQYVNFVNFVADGTRGEBQNESELDPDPVASTLGLGTRDVMALRSQDMVWVWGTQANWFHSPKRTAPRNLNFRQ
91091410 | Metaz | Trica : PVASBLMQOLEDSVEYLQTPRQAAAYDQGGKSGVTSIPPTETIQVRLIKRFFYVNFVNFVADGTRGEBQNESELDPDPVASTLGLGTRDVMALRSQDMVWVWGTQANWFHSPKRTAPRNLNFRQ
156386915 | Metaz | Nemev : PEANLFFQAEKVIKYDVPFRQATYFVGLDDEDEAGSKPVYPCADHARRSTEACVNFVNFVADGTRGEBQNESELDPDPVASTLGLGTRDVMALRSQDMVWVWGTQANWFHSPKRTAPRNLNFRQ
72054391 | Metaz | Strpu : NQADDLQRCCESELEYFDI PRKQVAGDGTGKKSQVTVPTTPALEHRDQIQEYKFNFVNFVADGTRGEBQNESELDPDPVASTLGLGTRDVMALRSQDMVWVWGTQANWFHSPKRTAPRNLNFRQ
68383159 | Metaz | Danre : EEAHDHFNQLEEEVEYFNI PRKQATYFVGLDDEDEAGSKPVYPCADHARRSTEACVNFVNFVADGTRGEBQNESELDPDPVASTLGLGTRDVMALRSQDMVWVWGTQANWFHSPKRTAPRNLNFRQ
48717226 | Metaz | Homsa : AEADIEFQLEKEVEYFVPRKQATYFVGLDDEDEAGSKPVYPCADHARRSTEACVNFVNFVADGTRGEBQNESELDPDPVASTLGLGTRDVMALRSQDMVWVWGTQANWFHSPKRTAPRNLNFRQ
118098574 | Metaz | Galga : AEADAIFFQLEKEVEYFNI PRKQVYGYPEPTSGVTFSPVNVNHRDRRLVHFTFNFVNFVADGTRGEBQNESELDPDPVASTLGLGTRDVMALRSQDMVWVWGTQANWFHSPKRTAPRNLNFRQ
18399917 | Strep | Arath : QQSWTFDYLDKHIPTWVLPQRTDTCVASSGLVSGYRPTSDPPPKKELDAIYKRFNSLNRKKGSEVAVHAEKELDAPYPTPEASVFGCERDEVTPASVFGCERDEVTPASVFGCERDEVTP
125596881 | Strep | Orysa : EAAWGFYDLDKRIPTWVLPQRTDTCVVADEGLRSGHQPHSDPVKDLKAVHESHFNLSLNRKKTQSYVSWVADEPLYPTPEASVFGCERDEVTPASVFGCERDEVTPASVFGCERDEVTP
156378655 | Metaz | Nemev : DETEMWFQQLAEIPEWKPRLTAVFGFPTTSGTLTRQSPITNIRKIAKETFNISMALNRHKNKSDWADEDEPSLVNPTASVFGCERDEVTPASVFGCERDEVTPASVFGCERDEVTP
51011105 | Metaz | Danre : EADAMFKSLLAELPWSEPRITCQYGELEPTSRSTMDAHPVATATRLAVAKETFNLSLNLDRDGSKSGWSSSEPSLPQPIIASVFGCERDEVTPASVFGCERDEVTPASVFGCERDEVTP
```

148238118|Metaz|Xenla : READWMFQQLQREIPWRHEPRLTCTGYGEVPTTSHSTMQPMPHPLNMMKDRIEEYNFNSLNLNRHDKSDWMSDDEPALNPTIASHSFGCTRMPDHCITLLMEGTQEDWQHRVPKYEPRINLTFRT  
21040275|Metaz|Homsa : KEADWILEQLQCDVPWKQDPRLTAYGLPPTSRITMPEHPVPTKRIIEEHTFNSLNLNRNKSNDWMSDDEPSLRCPITASHSFGATRTEMPDHCITLLMEGTQADWQHRVPKYEPRVNLTFRT  
118091513|Metaz|Galga : EQADMWFQQLQDVPWGEPRLTSYGLPPTSRITMQHPVPTMKQEIEEHTFNSLNLNRNKSNDWMSDDEPSLRNPTIASHSFGATRTEMPDHCITLLMEGTQEDWQHRVPKYEPRVNLTFRT  
167734879|Gamma|Xanca : AHADALMQALLDQVQWEDSPRLSSIGDADRSQGTQFAPLEAQPTVTRQLQDRAFNSVLRNRSRGAAGWMSDDEPELQAPVASHSLGAARRAFELGHCDLLMGGTQRHYKHAHPRTVGERINLTFRQ  
89890637|Bacte|FlabaB : AEAQQLSKLLKKTWRDEPRLTQLYDPPGSGSNISYDPTTQKQKRRQSNQNGWADNPELKNPITHASISLQGERFHPHQHGSLLVMAGTQHTYKQKACTKPRINLTFRK  
86130712|Bacte|Dokdo : EEAQHFYNTLYKETPWQAQPRLTALYGNNGSGSNITMHEPTFAISEKQKVEAIFSTCLNLNRDQSNQNGWADNPELKNPITHASISLQGERFHPHQHGSLLVMAGTQHTYKQKACTKPRINLTFRQ  
163789322|Bacte|FlabaA : BQAQFMTIEVETNWKQPRLTALFGDNNNGSNIVMHPHTTQIQSKKVKVENYKFTLNLNRDQSNQNGWADNPELKNPITHASISLQGERFHPHQHGSLLVMAGTQHTYKQKACTKPRINLTFRQ  
87303410|Chroo|SynspW : CDADQKLNRLQOEIPWRPMPRLTQVADPGHCYSGLANEPGSAALEREALAVWRFSVLRNRRDGSAGWMSDDEPELQAPVASHSLGASRSRELELGHCDLLMMDPTQHQWHLHAPRRLOQERVNLTFRL  
89092542|Gamma|Nepca : DTADQNFTLSNELEWRAPRLQNSMGDPGRSGLTLTGHVVKKELAEATEFNAVLNLNRDQSNQNGWADNPELQAPVASHSLGASRSRELELGHCDLLMMDPTQHQWHLHAPRRLOQERVNLTFRL  
84359602|Betea|Burdo : SDADRVLAAALIDEVAVRPLRLTAYGEPDPTVSGIRNERMPAILEKRAVETTRFNSVLRNRRDQSNQNGWADNPELQAPVASHSLGASRSRELELGHCDLLMMDPTQHQWHLHAPRRLOQERVNLTFRL  
149279285|Bacte|Pedsp : ELASQFYEQLSANVPKQLQPRFTAYGEEGNSSGITMNPPTPEAEARSAIQOHOENACLNLNRDQSNQNGWADNPELQAPVASHSLGASRSRELELGHCDLLMMDPTQHQWHLHAPRRLOQERVNLTFRL  
146306519|Gamma|Pseme : ALADSWFQALIEQTPWQRTPRLTAYGEPENRSRGLHEPTPLDEHRQRVAKQPLNAVLRNRRDGSAGWMSDDEPELQAPVASHSLGASRSRELELGHCDLLMMDPTQHQWHLHAPRRLOQERVNLTFRL  
90413319|Gamma|Phopr : PQAEHYFQCLLSELNWRLOPRLQACGDVPTTSGLTMNPTTTQSKESCOATSFNVAJANRRDGSAGWMSDDEPELQAPVASHSLGASRSRELELGHCDLLMMDPTQHQWHLHAPRRLOQERVNLTFRL  
37676115|Gamma|Vibvu : DQAEYTFQLKHELPELQPRLOACGDVPTTSGLTMNPTTTQSKESCOATSFNVAJANRRDGSAGWMSDDEPELQAPVASHSLGASRSRELELGHCDLLMMDPTQHQWHLHAPRRLOQERVNLTFRL  
158337277|Cyano|Acama : ADCEQLFATLEAELIARWLLPRLTAYGEPDPTVSGIRNERMPAILEKRAVETTRFNSVLRNRRDQSNQNGWADNPELQAPVASHSLGASRSRELELGHCDLLMMDPTQHQWHLHAPRRLOQERVNLTFRL  
38505765|Chroo|SynspP : VEASRYDRLEKEICWQPLPRLTAYGEPDPTVSGIAMEPTPLQTKKKAETAFNSVLRNRRDQSNQNGWADNPELQAPVASHSLGASRSRELELGHCDLLMMDPTQHQWHLHAPRRLOQERVNLTFRL  
93004919|Gamma|Psycr : -----FYNLVTELPWQITTRQIVMGGSDSQSGHTRQPTDTVFHKKHIEQANFNCSLNYSPSGEGYGAADDERELQPVASHSLGATRKVFYLESQQLVIMHGTSQFWKHSITKTKTRISLTFRQ  
20555576|Gamma|Maraq : GQTDFFRRLLLEIIPWAVTRRKAVALYGRDPTVSRATKQMPVVPVAAEKALVEQEPYNSCLNLNRHSGEAMWMSDDEPELKHGAVASHSLGAPRRVFMPEHGSLLVMSTQAFWQHSIPATKSPRINLTFRA  
110640165|Bacte|Cytlu : DTADHYLNTLQDIEWKITRKAVALYGRDPTVSRATKQMPVVPVAAEKALVEQEPYNSCLNLNRHSGEAMWMSDDEPELKHGAVASHSLGAPRRVFMPEHGSLLVMSTQAFWQHSIPATKSPRINLTFRA  
1526407|Flexi|Indci : AEPWAWYLEQDETTTLR-LRNCAMVYFGDPTVGHNDIYEHEYPWVERGNIFGK--FNCTAQTHDQGARWMSDDEPCYKDVVAVFVNTGNATSLKIKPKCDFIVLKPAQCCTKHAISCTKTLPRINLTFRQ  
62362155|Flexi|Aprps : FCSHGIVVKKGYPCEGLLKGGKGGFVLDYVFNHNSYPE--ATKK--KECILKIDENASLQIQIEKGSICMKKNEECYDDDCGLINVKGNATSWELKECNELMPPYQKPKKGGKSESEGRSVNLVAV  
9635791|Flexi|Chermo : CSKFLILEPVCKHLMRTNKGKKSIVTLDSEFNHSISYPT--GLKDWILSKAEVFPNAALVQVEKDCILGKMKNECSY-NHPLVNVNSGKAVSTELDSDDELLMPEFQKRFKFGKISITDGRMSVNLVAV  
50428561|Flexi|Opuvi : DPEYSWTFDLFLNLRKVVGKRWVTLYSKRPTVSGNITHSAMPEALTAICQNLQVDFDHCFLQVVEASASGLQDDEALIPDTEVTLNFGSADTLTTLPLNCTVYSMPFPQKTKHKAWSKNSAKRISITFRE  
14028555|Flexi|Zygyf : NCEQWTFHFLSNLRLVLRGRATVYSRNASGNTHTOPPESETAICQNLQVDFDHCFLQVVEASASGLQDDEALIPDTEVTLNFGSADTLTTLPLNCTVYSMPFPQKTKHKAWSKNSAKRISITFRE  
5620400|Flexi|Cacvi : DCEETWEHFIMGHLRVCVQRQVTLIYARNGSNVWTHRPAEATAJAKALDVEHDDHCFQVVEASASGLQDDEALIPDTEVTLNFGSADTLTTLPLNCTVYSMPFPQKTKHKAWSKNSAKRISITFRE  
75750460|Flexi|Alsvi : QDSATIPVHVSGWEREPLRGRKAAELSTROGHDKIRYDPAEITDFLRTVGF-QANAVLQVMEANAGPWRDDEKCYEKDALTLNFG-TATFEHLDCHFTMSGWLDLK-BRWNTCSADRMISLTFRV  
110611897|Flexi|Chemo : DQVDTLILPIRNLPTLTKGRKCYLTTSPGHDSVSYQPADEVEDSLLTLTGTQ-RANACLQVVEQDAKPLRDEKQVYAGHPVTLNFG-QASSEFELTDQWVMSGYLTQYKHAFAKSVGRISLTFRQ  
34105713|Clost|Litch : EDGMVVVKGLEGEVFNLLRGRDVAFSGKSGHDKVSYVPAEKEDKLVDCFGD--FNATAVQRVTLGGYVWMSDDEPCYHDDSVAVINFGQAVESISLDRSVLIMKALQIAKHMVRNFTDGRVSVLTKR  
117413399|Potyv|Blavi : SCNAALIHKEKWGLDSDLHGRATAMFSKDPGHHPIIYDPAENDEDKYLG---AKYNTALVQVMDGTRDPPYKDEPCYTNNTPTVAVNTGTGDLCPVTSCTVITTFPAMQENFYHAWRNPASGRISITFRN  
117413400|Potyv|Blavi : -----LHGRATAMFSKDPGHHPIIYDPAENDEDKYLG---GA-KYNTALVQVMDGTRDPPYKDEPCYTNNTPTVAVNTGTGDLCPVTSCTVITTFPAMQENFYHAWRNPASGRISITFRN  
20889382|Flexi|Citle : NISTLTSDDLPGDIPCGFGRKAAITKVDGSHNGMVPYSNPEEIQICQDQDFNCALINFGMEANSNGFHRONERVNDPILFVCTFGEGREITLMTAGSFFLMPKFKARHSNEM-SRVSITFRS  
56692801|Flexi|Swepe : SVAQTVISEIRFEGKLILGNRVASVYTKGKLSKGGSHEDLDMFNLLNLGLDYDVSIVQERAGGHHGFEDEDEEIPRGAQVTLVNLNGCQYSFELVEDSYFMPRFQEKYKHWGQCSMGRISITFRN  
20143433|Flexi|Garla : GAGIQTVAHFHVELLDVLLNRRAAAYYSKGS--SNLNGNHVMDLNDPESFLAINGHNYFCVLYQVVEASASGLQDDEALIPDTEVTLNFGSADTLTTLPLNCTVYSMPFPQKTKHKAWSKNSAKRISITFRE  
109240523|Picor|Blara : NKEVEYGLQLFNVEATLRGRMALVYSDGAAHDKHYHYTGPREDLAKKLG--YNSCLVQKDKGAYPFAADDEPCYDNDSVAVINLNGRATVIVELHHCSTLLELPCQKCKKSVNRVDOGRVSLTFRR  
9630738|Flexi|Rupst : EELRIMIRVLPEDFNWVLRGRGASFSKPGHNSNGSHTGPKFMDQLSSTGGNYNSCAQIIEENSKALHEDDESCYIGHKVTLVNLIGSATTTITGNPEFFEMPRMQCNVYFQVSNCTPGRVSLTFRR  
20522097|Flexi|Shavi : ECGTEITVNSFGRAIEVMKGRLAAYSRDGNSITGYSHKGLLEGDKIEACGETTYNQCQVQKVEQSGRGGFEDDEAIYKGNKILTVNAAGSGTEGINEDGDYFQVPSFQETHKKNVAV--TPRISITFRS  
110835686|Flexi|Narco : ACACGLSLPVRTLFLADLKGCTAGYCKEDNCPSPGSHAGPTFDITWCEVNEIAYKNSCYQVVEASASGLQDDEALIPDTEVTLNFGSADTLTTLPLNCTVYSMPFPQKTKHKAWSKNSAKRISITFRE  
156616261|Flexi|Colve : SCSCGLEMPISVVGGDLPGRRAAVTKDGTMKGGKHGDEREDLLEIHGFSLFDLSAQVVEASASGLQDDEALIPDTEVTLNFGSADTLTTLPLNCTVYSMPFPQKTKHKAWSKNSAKRISITFRE  
113195534|Flexi|Pasla : ECLCNSHIPVNSLLHDGLEGREVAVFSKGAARCAGSELKGPLWTPWLELNGLTKYDCMAQKVEGAETGFRDGTLFVEESVTLVNLGTAEFGINLGHGDYFQVPAFQSGSHRBAWRNTSAGRISITFRV  
154814488|Flexi|Chrvi : GCTHGGSGPCSVVLSIRAQNRVYAGYSKNGSNGGHEQNPGMVSMVRLVGEIYNCCLVQRDENAKGMSDDEECFTGGPPIYVNTTEGRATEMTEGPELDFMPPGFQETHKHAWEFETSKDRISITFRV  
41057346|Flexi|Popmo : ACGANLGLVFEAGAEFVVGSRKCGYSYMDGNSNGGSHTGPEWED--LLTLKNGVYDCLAQEAQAQGGKGFRRDDEPNLVGASITVNLVGEATEMLHRPSQCTVMPHFQESHKHAWEFETSKDRISITFRV  
19919920|Flexi|Blusc : VCACGLSMASVAVYAEKGRDAAYSKEDKKNNGSHLGPKWMLQMMQANGVETDCCMAQRQAQGGKGFRADEEIPFRGAVHTVSMGNDAGTGTTLRNVVTPSFOETHKHAWEFETSKDRISITFRV  
37674200|Flexi|Lilsy : TCCDGIIMNLKDVLGHTLRGQAAVYISDGGKNGGSHLGPKNVMMWLNKGVKYNCAQKQVQNSCGFRADEEIPFRGAVHTVSMGNDAGTGTGTTLRNVVTPSFOETHKHAWEFETSKDRISITFRV  
145651770|Flexi|Plvvi : KCGLDLRLALLGTDHLGNRRKGYSTTGKNGGHHKGPKNVMMWLNQNEIY-YDCCQVNVNNGRGGYSDDEPIFTGASITLNLKQADESFQVNLPMILMPEFQLSHKHAWCNCTAARESVTFRR  
94971810|Flexi|Dapvi : SCACCVTMELKSPVETLLRGRAGVYSRDNNTTGAISHQAAMDEWLKVLVDLY-YNSCLVQVVEADATNMSDDESLFKGGRITVNLVGSVAVHVEVGFQVFMPPAFQETHKHAWEFETSKDRISITFRV  
14251191|Flexi|Acola : ICKCGMSMPIIDLVLPELRRNRAGVYSRDNNTTGAISHQAAMDEWLKVLVDLY-YNSCLVQVVEADATNMSDDESLFKGGRITVNLVGSVAVHVEVGFQVFMPPAFQETHKHAWEFETSKDRISITFRV  
160700643|Flexi|Phlvi : TCSCGVSMKIKTLGSDLKGRVGGVYSKDGMLTGGSHLGPDMWELMMQINKVYKNSCLVQIIEEGASGYADDEPIFKGEBHPCNLSGKAVSEIYLECPMFTVPMFQETHKHAWEFETSKDRISITFRV  
96314013|Flexi|Hopla : GCSCGVAMDISSISVAELKGRKAGVYSMDGNTTGGSHKGT--DSLWMCANAVPKYDSCVQIIEEGAAAGYADDEDLFQGESITLNLVSGAAEFGVHRGPOQFEMPAFQVTHKHSVWGCSSRQRESVTFRC  
1035565|Flexi|Chene : -----ISSMIVKGFPSHSGRKALESFEGNNGSNVYEGMIVFKYI-----DRFNCSLQVNVNNGRGGYSDDEPIFTGASITLNLKQADESFQVNLPMILMPEFQLSHKHAWCNCTAARESVTFRR  
9630734|Flexi|Chegr : -KVGEFDKNAIRKFASDHKGRALVYSRGSNSVYTPGPAEFEEAY-----SRFNCSLQVNVNNGRGGYSDDEPIFTGASITLNLKQADESFQVNLPMILMPEFQLSHKHAWCNCTAARESVTFRR  
13182719|Flexi|Cloye : NCGTRLEEPVITQTVLLKGRKAAVHSRGGNSITGTHOPNQTDQIQSAGFTDFDHCILQRVYHGRHREPSNNEPCYEAANPLTINTEGQAEIIRLGNPSWLLMPSLQETHKHAWEFETSKDRISITFRV  
160707860|Clost|Pluba : SSDIVATVTVNVPDKSLNKRKATFSRDFKVVGGNHRGNSRDDGLLDMGFEDFDHCILQSDDDGSPARADNEACYKDVETLNAVGSAGSLGLPKPEYFLMPCACQTHKHAWEFETSKDRISITFRN  
20153378|Flexi|GraviB : SCGVRLEPMRKLTPKVLKGRRAAVYSRHSSTKGANHAGPEWVSNAEKLEDFDHCILQIIEEDKGNFNAADDEPCYTDPEVTVNLVGNANVHPLPDSQVLLMPPKFKTHKHAWEFETSKDRISITFRV  
20153360|Flexi|GraviA : EKFKSVRSLCREIYSELKGREVAVYSRHSSTKGANHAGPEWVSNAEKLEDFDHCILQIIEEDKGNFNAADDEPCYTDPEVTVNLVGNANVHPLPDSQVLLMPPKFKTHKHAWEFETSKDRISITFRV  
29653349|Clost|Grale : TCSGCVQLDVNEATIALKGRSAVFSKLDNTGSSHVGPRAEDLTLAIKYVDFDHCILQKVKMGGKGFRADEEIPFRGAVHTVSMGNDAGTGTGTTLRNVVTPSFOETHKHAWEFETSKDRISITFRV  
19744939|Flexi|Appst : KCDLNCFTIQPADVNSLHSGRGAISYRDLSTTGPSSHVPAFDKFLSDKNINYNQCLVQKVEGHSMLKDEESYINHQVTVNYSGDATCIPISGPOHLLMPPFQETHKHAWEFETSKDRISITFRV  
85718600|Flexi|Altmo : HCPCGETLKFSAEFPPLKREAVFSRDRGNSITGGSHVGPAPFDLQALATALPHFNQCLQKVRGASPFADNEPCYVDHQLTINTEGAEAKTIVENQFHLSPFPQETHKHAWEFETSKDRISITFRM  
9629168|Flexi|Papmo : LCPCGLHLKIKNAEFPFLTGRRAVFSKDGNSITGGSHVGPAPFDLQALATALPHFNQCLQKVRGASPFADNEPCYVDHQLTINTEGAEAKTIVENQFHLSPFPQETHKHAWEFETSKDRISITFRM

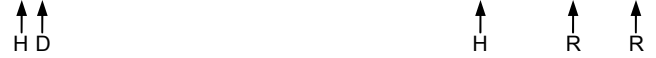

**Figure S1. Alignment of representative sets of AlkB protein sequences from bacteria, eukaryotes, and viruses.**

Actin = Actinobacteria; Alpha = Alphaproteobacteria; Bacte = Bacteroidetes; Betap = Betaproteobacteria; Choan = Choanoflagellida; Chroo = Chroococcales; Cilio = Ciliophora; Clost = Closteroviridae; Cyano = Cyanobacteria; Delta = Delta-epsilon\_subdivisions; Dicty = Dictyosteliida; Flexi = Flexiviridae; Fungi = Fungi; Gamma = Gammaproteobacteria; Kinet = Kinetoplastida; Metaz = Metazoa; Picor = Picornavirales; Potyv = Potyviridae; Strep = Streptophyta.

Acama = *Acaryochloris marina* MBIC11017; Acola = Aconitum latent virus; Alsvi = *Alstroemeria virus X*; Altmo = *Alternanthera mosaic virus*; Anoga = *Anopheles gambiae*; Apime = *Apis mellifera*; Appst = Apple stem pitting virus; Aprps = Apricot pseudo-chlorotic leaf spot virus; Arath = *Arabidopsis thaliana*; Aspfu = *Aspergillus fumigatus* Af293; Aspnid = *Aspergillus nidulans* FGSC A4; Aspni = *Aspergillus niger* CBS 513-88; Blara = Black raspberry necrosis virus; Blavi = Blackberry virus Y; Blusc = Blueberry scorch virus; Brasp = *Bradyrhizobium* sp. BTAi1; Burdo = *Burkholderia dolosa* AUO158; Cacvi = Cactus virus X; Caebr = *Caenorhabditis briggsae* AF16; Chegr = Cherry green ring mottle virus; Chemo = *Chenopodium mosaic virus X*; Chermo = Cherry mottle leaf virus; Chene = Cherry necrotic rusty mottle virus; Chrvi = *Chrysanthemum virus B*; Citle = Citrus leaf blotch virus; Clove = Clover yellow mosaic virus; Colve = *Coleus vein necrosis virus*; Cordi = *Corynebacterium diphtheriae* NCTC 13129; Corgl = *Corynebacterium glutamicum* ATCC 13032; Cryne = *Cryptococcus neoformans*; Cythu = *Cytophaga hutchinsonii* ATCC 33406; Danre = *Danio rerio*; Dapvi = Daphne virus S; Dicdi = *Dictyostelium discoideum* AX4; Dokdo = *Dokdonia donghaensis* MED134; Drome = *Drosophila melanogaster*; Escco = *Escherichia coli* K12; FlabaB = *Flavobacterium bacterium* BBFL7; FlabaA = *Flavobacteriales bacterium* ALC-1; Galga = *Gallus gallus*; Garla = Garlic latent virus; Gibze = *Gibberella zeae* PH-1; Grale = Grapevine leafroll-associated virus 3; GraviA = Grapevine virus A; GraviB = Grapevine virus B; Homsa = *Homo sapiens*; Hopla = Hop latent virus; Idilo = *Idiomarina loihiensis* L2TR; Indci = Indian citrus ringspot virus; Lachi = *Laccaria bicolor* S238N-H82; Leima = *Leishmania major* strain Friedlin; Lilsy = Lily symptomless virus; Litch = Little cherry virus 2; Maggr = *Magnaporthe grisea* 70-15; Maraq = *Marinobacter aquaeolei* VT8; Meslo = *Mesorhizobium loti* MAFF303099; Metfl = *Methylobacillus flagellatus* KT; Monbr = *Monosiga brevicollis* MX1; Musmu = *Mus musculus*; Myxxa = *Myxococcus xanthus* DK 1622; Narco = Narcissus common latent virus; Nemve = *Nematostella vectensis*; Nepca = *Neptuniibacter caesariensis*; Neucr = *Neurospora crassa* OR74A; Opuvi = *Opuntia virus X*; Orysa = *Oryza sativa Japonica* Group; Papmo = Papaya mosaic virus; Parte = *Paramecium tetraurelia*; Pasla = *Passiflora latent carlavirus*; Pedsp = *Pedobacter* sp. BAL39; Phlvi = Phlox virus B; Phlvi = Phlox virus S; Phopr = *Photobacterium profundum* 3TCK; Phypa = *Physcomitrella patens*; Pluba = Plum bark necrosis and stem pitting-associated virus; Popmo = Poplar mosaic virus; Pseme = *Pseudomonas mendocina ymp*; Psyrc = *Psychrobacter cryohalolentis* K5; Raleu = *Ralstonia eutropha* JMP134; Rhopa = *Rhodopseudomonas palustris* CGA009; Rupst = *Rupestris stem pitting-associated virus*; Sacer = *Saccharopolyspora erythraea* NRRL 2338; Schpo = *Schizosaccharomyces pombe*; Shavi = Shallot virus X; Shesp = *Shewanella* sp. MR-7; Strco = *Streptomyces coelicolor*; Strpu = *Strongylocentrotus purpuratus*; Swepo = Sweet potato chlorotic fleck virus; SynspW = *Synechococcus* sp. WH

5701; SynspP = *Synechocystis* sp. PCC 6803; Tetth = *Tetrahymena thermophila* SB210; Thefu = *Thermobifida fusca* YX; Trica = *Tribolium castaneum*; Trybr = *Trypanosoma brucei* TREU927; Vibvu = *Vibrio vulnificus* YJ016; Vitvi = *Vitis vinifera*; Xanca = *Xanthomonas campestris*; Xenla = *Xenopus laevis*; Yarli = *Yarrowia lipolytica* CLIB122; Zygvi = *Zygocactus virus*

The arrows indicate key residues in the conserved HXDX<sub>n</sub>H and RX<sub>5</sub>R motifs. Numbers represent Genbank Identifier (gi) numbers.

Figure S2

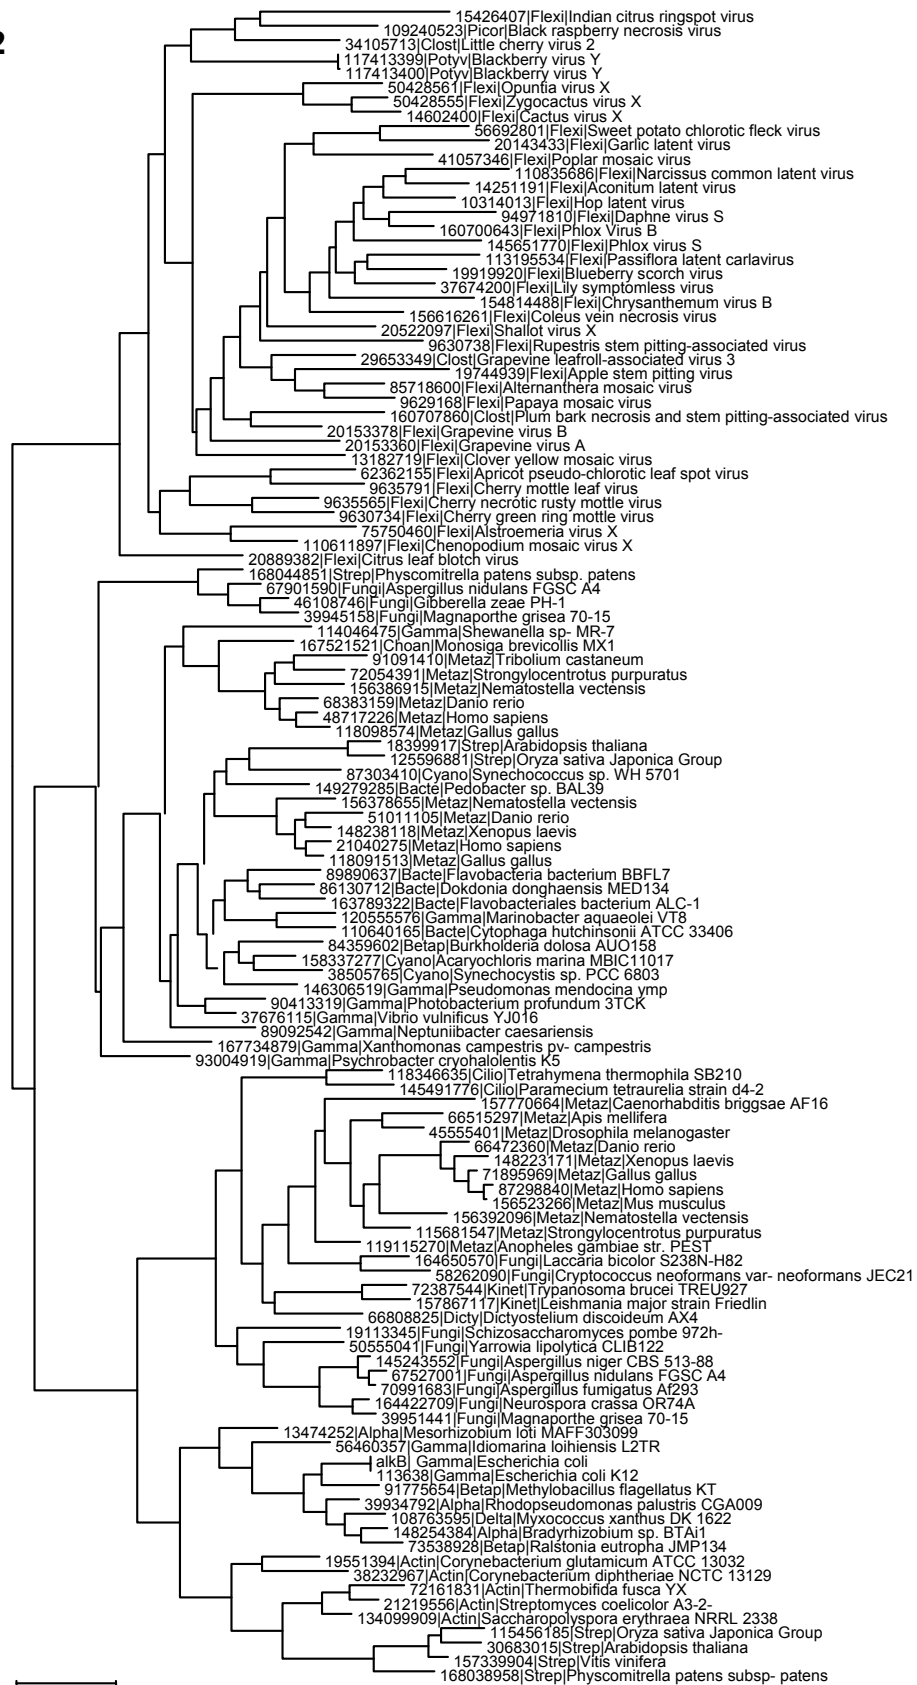

50

**Figure S2. Phylogenetic tree constructed from the alignment shown in Fig. S1.**

The scale bar represents the number of substitutions per 100 residues.

Figure S3

```

113638|Prote|Eschecol      : VTPGGHLGTTIHRQGLYSPIDPQTNKPEAMPQSFHNLQCRAGYDAQILNRYAPGAKTSLRQDDPEDLR--APFVSVSIEGLFAIFQFGGLKRNLRLLLEHGDDVVVWGGSERLFLVGGTQPLKAGRYNLTFRQ
94312699|Prote|Ralstmet   : VTPGGALGTTIDRRGRYTTVDPDTKGPKFVMEVFFRLANEAAFTACLLNRYLPGSRALALQDDNEQAEE--TPHVSVSLGMRATFLFGGHARTTIKVPLLHGDVVVWGGADRLRYLGVMPPIKADRIINFTFRK
13626100|Prote|Caulovib   : RTAGGSLGTTSDARGRYVDRHPETGRPEFMPFALLDLW--LGDTSCLVNLVLDGARMGLRQDDADPR--FPVLSISLGDTAVERIGGVNRKTRSLRLASGDVCRLLGLPARLAFVGGDRILLPGFINLTLFR
160700643|Flexi|PhloxVir  : RLKGRVGGYYSKDGTYLYTGGSHISQGFDMWELMWMQINKVPDKYNSCHYIYEEGASVGYHADDEPIFKKGBEHLHCNLSKAVFEIKCRNGAGGEYEGPMQTFMPDFQGTTHKYSVSGTTKGSVSTFRV
113195534|Flexi|Passilat   : KLEGRVAVWFSKGAVYRCAGSELKSLGPLWLPWLELNGLPTKYDCMAKQVVEGAETGFRRDGTFLKVEESVLTNLLGTAEFEGIECKNGAVWRNLGHGDYFQMPAGPQGSHRHARNTSAGRIISYTFRV
110835686|Flexi|Narcicom   : DLKGTAGTYCKEDVYVNCPSGSHASLGPPTLDTWCEVNEIPAKYNSCHYVYKAGSSTALSHDGLMFIPEEGFLTVNLLGSATLSTECSSGVSRSVVDGAVFVFPMPHGLQSTHKYSVSDCSPGASLTFR
14251191|Flexi|Aconilat   : TLNRBRAGWYSRGNISYNGGSHQSLGPNYITTWCEVNGVEGKYDCCLYVVEAEAAAGFHADDETIFEPGESVLTINLEGRASFISCAKAGDSFRVNGPLQFTMPMGFOADHKIKVRGCTAGASLTFR
19744939|Flexi|Apple_PA66 : GSKGRGASYSRDLKYSYTFGSHVSRGPAFIDKFLSDNKIPNFYVQCLVVEYSTGHGLSMHKDDSESYDINHQLVTVNYSQDAIFCIECLGSGFEIPLSGPQMLLMPFGQKHEHRGKSPSKGRIISLTFR
110611897|Flexi|Chenomom  : QLKGRKCYFLTSPIDGHDSVSYQACPDEVLSDDLITLTG--QRANACIICVVEQDAKPLRDRDDEKQVYA-GHPLTMMNF--QASFSFS--NG-ETFEITDGGVFWVSGKMLTQYKAAFAKSVGRISLTFRN
75750460|Flexi|Alstrvir   : QLRGRKAAFLSTRQIMGHDKIRYDINPNEITDFLRTVGF-Q-ANAVIIVVEANAGIPWHRDDEKCYE-KDAHLTLNF--GTATFEFS--NG-TKLHITDGGCHFMISGENLD-LKRVVNCSDMSLTFRV
20486407|Flexi|Indiacit  : RLNRNCAMWFGPPTHYGHNDIEYHTTEYVWVERIGNIFG--KFNTOCAGTHDQGARIGYHADDEDCYDKDVTVAIVNLTINATFSLKATATGTRTWKIKPGDFVILKPGAQCGTKHATSDCTNNTSLTFRW
25889382|Flexi|Citrulea  : QFRGRKAAFLIKVDVAYGHNGMVYPHNSVPSSEIIQICGGDDFCANINFINVANSLLGFHRDRNERVYN-DDPHTLVCTFEGRETFIEFKDQVTSFLYTAGSFFLMPKGFQKKARHVSVNEMS-RVSI TFRS
62362155|Flexi|Apricpse  : QLKGRKGGFVLDVYVPHNNVSYPSFEATMKIKECILKARRIDFNASIIICVYEKGSIIIGMKDNECYD-DDGVLPLNVKONATFSVSCHDN--VIELKEGNELLMPFGYQKFKKQKSESEGRISVTLRV
9635791|Flexi|Cherrmot   : PNKGRKSVVYVLDVSMVFNHSISYPSIEATGLIKDWILSKAEADVFNAAVYVEKDCIIGMKDNECYD-NHPLTVMNVSQKAVFSTDCCGN--TMEIDSGDELLMPEDFORKFRHVKISITDGRMSVTLRV
22416436|Clost|Littliche : KLRGRDAWVFSKSGDYGHDKVSYVVLPAKHEIDKLVDFCG--DENTALVRYTLGGYVSWHADDEPCYSHDDSVITINFNPAVFSIQ--SGNRSFNLDRSVLIMKAGLQAKHVRNDFGRMSVTLRV
117413400|Potyv|Blackvir  : RLHGRDAWVFSKDPMLGHPPIYYDHPNDKEDIDKLVGG--AKNYTAVVYDGTARDLPHKDDPCYDNNRPIVTVNVTGDLCSIKDKRRETIPVTSQVITTFATMOENFYHVRNPSAGSISITFR
50428561|Flexi|Opuntvir  : KVCKRWWVLYSKRPIVSYGNITHSAQAPPEAIVTAVCNQLNSDDFTFHCIFVVEASASILGHQDDALIPDTEVPLNLSGADLTLDIKTCGCTFPLNGTVKYSVPLMAGVETSKGRIISITFRE
50428555|Flexi|Zygocvir  : KLRGRATWVYSRNATVSYGNITHQALVPESITAITQALDIPNEHDCIFVVEKQSSIQFADDEBALIRPNSITITVSI--GCELLTKEKSSGQKQISGVPVHTMPEGQSTHLSKSLQEQRLSITFRD
14602400|Flexi|Cactuvir  : KVQGRQVTLVARNGIYSYGNVTHKAQPPAETAITAKALDVPPEHDCIFVVEQQAANFNSDDDEPLIQPGSPITPLSI--GCELLTRDKSNKHKQLSGPIIYTMPSGQETHQISVRSLKQKNSITFRD
9635565|Flexi|Chernec    : GFQGRKALVFSSEGNFYGFNSVKYESHGPIVFKELYG----DRFNSCLVGHYKKAATLGLKDDDECYEKDHEVMTINLIFKATLFFTRDRNDPEMITSHGEYILMPRGFQSQYKGVKDKQAGSITFR
9630734|Flexi|Cherrgrec  : GYKGRATLWVFSRGSFYGFNSVTPYPSQGPAAFEAEAYG----SRNSCHVYIYVEFGSKLGFHSDDESCYDDDLVYVTVNLFECACIAPRSQGPVEVVKISDGEFFLMPKGFQCFQSVKVAANNVSVLTFRL
56692801|Flexi|Sweetpot  : NLGNRVASWYVSKGVYSYKGSHEAKDLDMFNLLILNGLPDYDSDVVEYRAGGGINFKKDDIEFERGAKLTVNLLGQCYFSFSSPKETVSEFVEDSYFEMPRDQEKYVYGVQCSMGRISMTFR
20143433|Flexi|Garlilat   : RLLNRRAAFYSGKCFVSYNGGNHVGHEDLNDFDSFLAINGHDNYFNCVVEQYDGGHGFHGHSDDEELFERKNSRLTICIQDCEFERFRCATGETGFFMEAPKQFMPPEGQESHKHAVRGCSPPGRIATFR
20522097|Flexi|Shallvir  : HMKGRLAAYSRDQGYSYTGYSHKSGQGLEGDKLIEACGEKTYNQCCLVQKVEQGSRIGFHSDDECALYPKGNLTVNNAAGSGTFGIKCAKGETTLNEDDGYFQMPSPGQETHKINVVAVTP--RLSITFR
154814488|Flexi|Chrysvir : PAQNRVYAGEYSKNGVSYNGGEHQSLNPGWISVMMRLVGIPEINCCLVORYDENAKIPEHNSDDEECFVTGGPIYVTVNTEERATFMTCKEGKTSFELGPGDLFEMPPGQFQTHKHAVFETSKGRIISITFR
156616261|Flexi|Coleuvei : VLPGRRAANFVKDGTVYKGGKHAMSGDERDILLEIHGFESLFDASVVEYEQGARIGFHSDDESIKVGSEELMQLKCTSRFAIQGSRCYGSSALGGCHFTMPAGFQETHKHAVECCSSGTSITFRV
41057346|Flexi|Poplamom  : KVGSRKCGWYSMDGVSYNGGSHTSQGPWIVDVLTLNGLVGVGYDCLAEVVAQGGKIGFHRDDEPNLDVGASITVNLVYEAFTFMLKGGHGLTKLHRPSQCFTMPHQPQESHKHAEGCSKGRVSLTFRV
19919920|Flexi|Bluescco  : ALKGRDAAYSKEDRYKNGGSHLCRGPVWMLQLWMOANGVDETYDCMLNRYVGAQKIGFHADNEEIFMRGAPVHTVMSMDNADFGTECAAGRQYTTIRGNVQFTMPSGQETHKHAVRNNTAGVYTFTR
37674200|Flexi|Lilysym  : NLRGRQAAWYSIDGRVYKNGGDHVSQGPVWMLQMMALNGVDKYNCLMAKQVQVNSCLGFHADDEALFVAGESITVNTVITEADFKVCTCPNAGAGELRQEAQMPFMPGQOQTHKHAVANCTAGSISYTFRV
145651770|Flexi|Phloxvir : DLGNRKGWYSTTGWYKNGGHHKSGQPKWIMYMLLEHRSSEYVAVIKNLAEGALVTVRSDEGSVLEVVYVNLNGVNLVAK-----CAGEGLY-TKEGVLTVE--DFQ-AHEMGTVPTEAGRIILVGRM
94971810|Flexi|Daphnvir  : PLRGRAGWYSRDGHVNYTGASHKSLGAAWMDEWLKVLDDNYVNSCHYVVEADATLNWHSDDDESLFEKGGRIATVNLVSGSAVFHVKCMNGCRANEVGFVGFVEMPADFQSTHKHKLNSPNSGRVSTFR
10314013|Flexi|Hoplat    : FLKGRKAGWYSMGDVYTYNGGSHKSGQDSDLQMWCEANAVDPKYDSCCHYIYVEGAALGYHADDELFEEQGESITLNLVSGAAEFVGVCKNKGKSVHRPQGPQFEMPAGFQVTHKHSVWGCSSRORESVTFRC
109240523|Picor|Blackras : SLRGRMALVYSDGAFVAHDKYHYTSQGPREVDDLAKKLG--GYNSCLVQKVDKGAYPFHADDEPCYDNDNSVITVNLNCRATFIVRNKTTGTTRREHHGSIEMLPSCQKCKHVSVNRDQGRVSLTFR
9630738|Flexi|Rupesste  : RLNRBRAGWYSRGNISYNGGSHASLGPPTLDTWCEVNEIPAKYNSCHYVYKAGSSTALSHDGLMFIPEEGFLTVNLLGSATLSTECSSGVSRSVVDGAVFVFPMPHGLQSTHKYSVSDCSPGASLTFR
13182719|Flexi|Cloveyel  : ILKGRKAAFLHRGGEYSYTFGTHQAQPNQTLDQIIQSAGFQTFDHCILIRYQNGYHRRPFDNEPCYPEANPLTINTEQAEFIISRGEVKTYSRIGPNSWLLMPSGLQETHKHEVIAMSEGTSLTFR
29653349|Clost|Grapelea  : NLKGRSAVWFSKLGWYTYNGGSHVSSGPRADIEDILTAIKYPSVFDHCVVYKMKGGVYFPHADDEECYPSDNPILTVMNLVKANFSTKCRKGGMVINVASGDYFLMPCGFQRTHLHSVNSIDEGRIISLTFRA
85718600|Flexi|Altermos  : RLKNEAFTVFSRDGTYSYTGSHVSRGPAFIDQILATAELVPHFNQCLIKYQKRGASPFHSDNEPCYDNDHCVLTVNLTGAEAEFKTSCKAGSGSCTVENQFHLSPPGQKTHKHSVSLSAGVSLTFRM
9629168|Flexi|Papaymos   : HLTGRKAWVFSKDKGYSYTGSHASRGPVWMLQMMALNGVDKYNCLMAKQVQVNSCLGFHADDEALFVAGESITVNTVITEADFKVCTCPNAGAGELRQEAQMPFMPGQOQTHKHAVANCTAGSISYTFRV
27502542|Flexi|GrapeV_A : KLNREVAWYSRYSKYVYKGGSHSLGDKADDELIELGLDESVDHCILIRYSEGGSIINFHADDEPCYLPGGTVVTVNLTGAEAEFKENTSGESKRLKDGVDVTVGAGMQOQTHKHKVTLNGLCSITLFRN
160707860|Clost|Plumbar  : RLKNEKATVFSRDFSVYKVGNNHRSYGNNSRDGLLDMGFQEDFDHCILCISYDDGGSIPAHADNEACYDKDVEVTLNAVSAKFSLVCKEGQVRFPGKPEYFLMPAGCQTHKHAQATSSGRISLTFRN
32351298|Flexi|Potatv_M  : QVACASVGLYTKDRSLMWNSELLSNGPFRSITWMEVNSVQKPDVAVRLSYSKETQVNVLLPSLDLIERGAGATVNLNRKCGAEIVRCAEGGDCAGVDPGLLVVVGQDQIC-HECYRGLERENDVVLK
156603888|Flexi|Potatv_P : EVVVGPGVWYARVGE--MLGRMLVQEPKWHDMYLELHRSSEYVAVIKNLAEGALVTVRSDEGSVLEVVYVNLNGVNLVAK-----CAGEGLY-TKEGVLTVE--DFQ-AHEMGTVPTEAGRIILVGRM
71849436|Flexi|Potatv_S  : GVPGRRAAWYCRGQIYISGAIRLENLGPVWMLQMMALNGVDKYNCLMAKQVQVNSCLGFHADDEALFVAGESITVNTVITEADFKVCTCPNAGAGELRQEAQMPFMPGQOQTHKHAVANCTAGSISYTFRV
70906991|Flexi|Hippelat  : ETEYGVVWYVSRGEVCAALDGHYKSLGPEWQLWCVAANDVAQRVYCCVYKFAAEKDIWGSMSVAEQVDEAGALVNLQCTLKFQMNCTSG-KFEL--GLKEPCLEVGKRSPEFGTSGCTGNSLSARMC
18652419|Flexi|Scallvir  : QTVGRRTYLASPPVSDPDLPTNLAQPTISVDVDSLGI-S-ATACFIIVYDEGLNQPRWYGRKPE-SVDSISLTLT--QAELELA--GG-KRSLIKVGDWFTINGPLLO-RGHHVSVGSPQCILTLTWL
37905678|Flexi|Narcimos  : RLKGRSRYVYTSVLMLENLLTPIPEESRSDIILTLN--TPANACCIILDCSAAASAWDWSVRPIK-IFPVAVGM--ETTLTFE--DD-STILLKEGEFVVVPEFLARHKYQKTAASNLHLCAITLV
157427654|Flexi|Apple_PR1 : GFNHKGVSLYSRDLSVSSSGYLQVSKPEKLIKGFISENIIPKFKQCGNEVRSDDGSSITQNYNFIANSRNFVTVNYSQDAIFCIECLGSGFVIRSGPQMLLPLGRKRNHRLKSPNSGRITASTFR

```

inactivated AlKBs

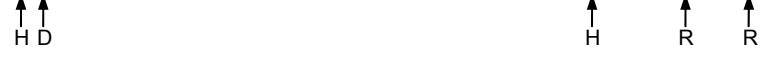



### Figure S3. Alignment of selected viral AlkB protein sequences.

Prote = Proteobacteria (as outgroup); Flexi = Flexiviridae; Clost = Closteroviridae; Potyv = Potyviridae; Picor = Picornavirales.

Eschecol = Escherichia coli K12; Ralstmet = Ralstonia metallidurans CH34; Caulovib = Caulobacter vibrioides; PhloxVir = Phlox Virus B; Passilat = Passiflora latent carlavirus; Narcicom = Narcissus common latent virus; Aconilat = Aconitum latent virus; Apple\_PA66 = Apple stem pitting virus, isolate PA66; Chenomos = Chenopodium mosaic virus X; Alstrvir = Alstroemeria virus X; Indiacit = Indian citrus ringspot virus; Citrulea = Citrus leaf blotch virus; Apricpse = Apricot pseudo-chlorotic leaf spot virus; Cherrmot = Cherry mottle leaf virus; Littlche = Little cherry virus 2; Blackvir = Blackberry virus Y; Opuntvir = Opuntia virus X; Zygocvir = Zygocactus virus X; Cactuvir = Cactus virus X; Cherrnec = Cherry necrotic rusty mottle virus; Cherrgre = Cherry green ring mottle virus; Sweetpot = Sweet potato chlorotic fleck virus; Garlilat = Garlic latent virus; Shallvir = Shallot virus X; Chrysvir = Chrysanthemum virus B; Coleuvei = Coleus vein necrosis virus; Poplamos = Poplar mosaic virus; Bluebsco = Blueberry scorch virus; Lilysym = Lily symptomless virus; Phloxvir = Phlox virus S; Daphnvir = Daphne virus S; Hoplat = Hop latent virus; Blackras = Black raspberry necrosis virus; Rupestte = Rupestris stem pitting-associated virus; Cloveyel = Clover yellow mosaic virus; Grapelea = Grapevine leafroll-associated virus 3; Altermos = Alternanthera mosaic virus; Papaymos = Papaya mosaic virus; Grapev\_A = Grapevine virus A; Plumbar = Plum bark necrosis and stem pitting-associated virus.

Viruses containing an inactivated AlkB form are indicated: Grapev\_B = Grapevine virus B; Potatv\_M = Potato virus M; Potatv\_P = Potato Virus P; Potatv\_S = Potato virus S; Hippelat = Hippeastrum latent virus; Scallvir = Scallion virus X; Narcimos = Narcissus mosaic virus strain New Zealand; Apple\_PR1 = Apple stem pitting virus, isolate PR1.

The arrows indicate key residues in the conserved HXDX<sub>n</sub>H and RX<sub>5</sub>R motifs. Numbers represent Genbank Identifier (gi) numbers.
